# Supplementary material for: The structure and UV spectroscopy of benzene-water (Bz-W6) clusters using time-dependent density functional theory
Source: Royal Society of Chemistry journal article supplement (doi:10.1039/c4pp00211c), 2014-09-01
Supplement: c4pp00211c1.pdf [file c4pp00211c1.pdf]

# The Structure and UV Spectroscopy of Benzene-Water (Bz-W<sub>6</sub>) Clusters using Time-Dependent Density Functional Theory

Divya Sharma,<sup>a</sup> and Martin J. Paterson\*<sup>a</sup>

## Supporting information

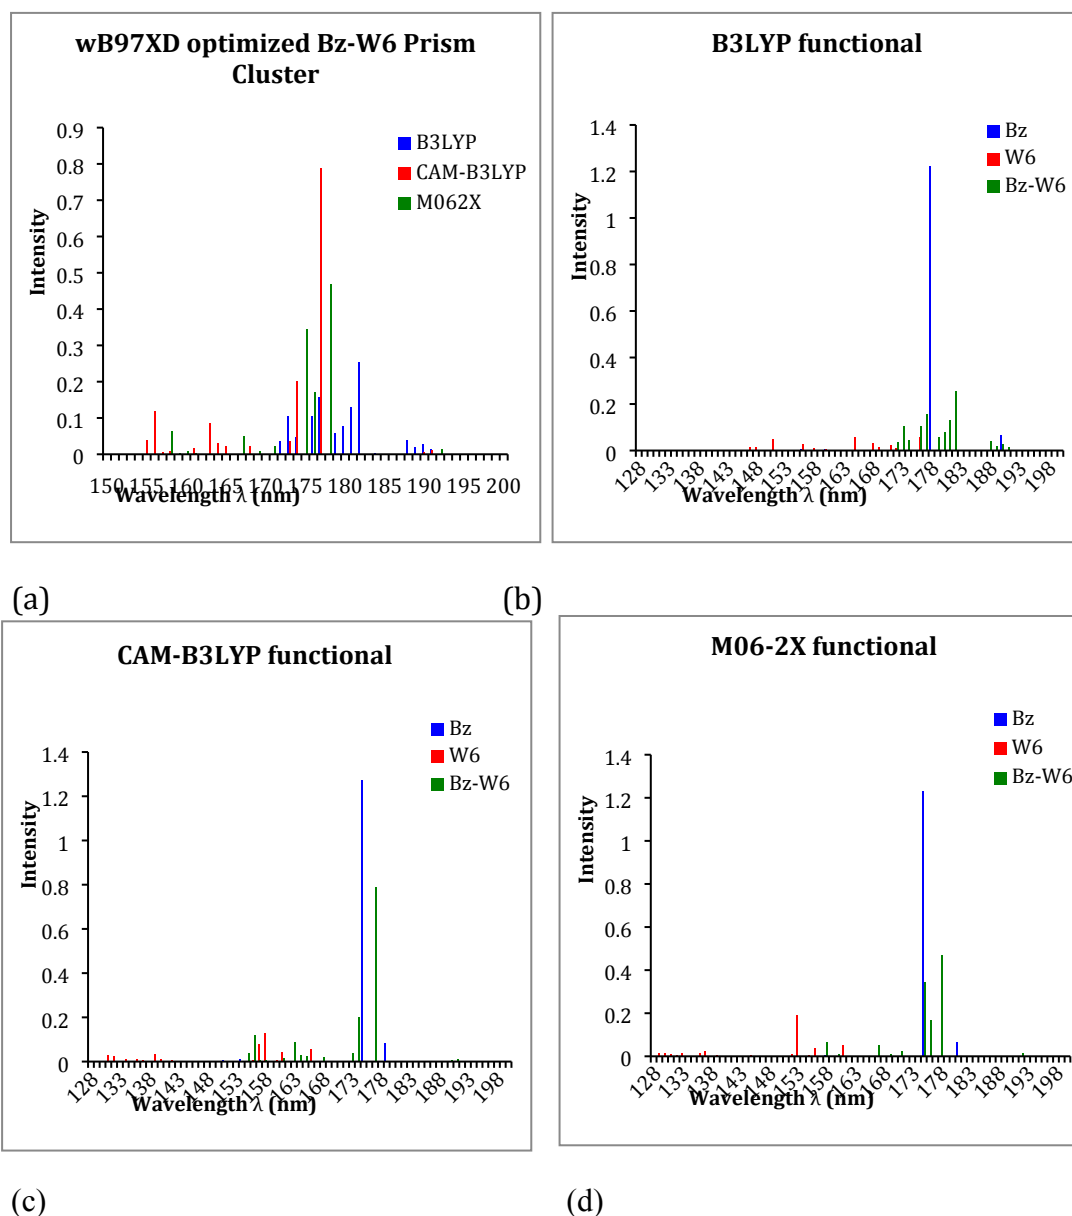

Figure S1. Simulated UV spectra obtained from TD-DFT calculations on wB97XD optimized ground state geometries of prism shaped water W<sub>6</sub> cluster, Bz-W<sub>6</sub> cluster and Bz using 6-31++G(d,p) basis set. (a) Comparison of B3LYP, CAM-B3LYP and M062X functionals performance on Bz-W<sub>6</sub> prism cluster (b) Performance of B3LYP functional (c) Performance of CAM-B3LYP functional (d) Performance of M06-2X functional.

Table S1. List of important electronic transitions corresponding to highest peak intensities (oscillator strengths) obtained using B3LYP, CAM-B3LYP and M06-2X hybrid functionals on wB97XD optimized Bz-W<sub>6</sub> prism shaped clusters using 6-31++G(d,p) basis set. (Value in parenthesis correspond to singlet  $\pi \rightarrow \pi^*$  transition of an isolated benzene molecule).

| DFT functional   | E (eV)      | $\lambda$ (nm) | Oscillator strength ( <i>f</i> ) | Electronic transition   |
|------------------|-------------|----------------|----------------------------------|-------------------------|
| <b>M06-2X</b>    | 7.08 (7.10) | 175.0 (174.6)  | 0.3433 (0.6154)                  | $\pi \rightarrow \pi^*$ |
|                  | 6.98        | 177.8          | 0.3025                           | $\pi \rightarrow \pi^*$ |
|                  | 6.95        | 178.5          | 0.1647                           | $\pi \rightarrow \pi^*$ |
|                  | 7.06        | 175.7          | 0.1696                           | $\pi \rightarrow \pi^*$ |
|                  | 7.85        | 157.9          | 0.0376                           | W-Rydberg State         |
| <b>CAM-B3LYP</b> | 6.99 (7.08) | 177.5 (175.0)  | 0.4032 (0.637)                   | $\pi \rightarrow \pi^*$ |
|                  | 7.00        | 176.9          | 0.3839                           | $\pi \rightarrow \pi^*$ |
|                  | 7.94        | 173.6          | 0.2023                           | $\pi \rightarrow \pi^*$ |
|                  | 7.14        | 156.2          | 0.0993                           | W-Rydberg state         |
|                  | 7.62        | 162.6          | 0.0869                           | W-Rydberg state         |
| <b>B3LYP</b>     | 6.82 (6.97) | 181.8 (177.9)  | 0.2545 (0.6122)                  | Water CT state          |
|                  | 7.02        | 176.7          | 0.0923                           | Bz Diffuse state        |
|                  | 6.99        | 177.2          | 0.0643                           | Bz CT state             |
|                  | 6.85        | 180.9          | 0.1286                           | Water CT state          |
|                  | 7.15        | 173.4          | 0.1062                           | Bz CT state             |
|                  | 7.03        | 176.4          | 0.1046                           | Bz diffuse state        |

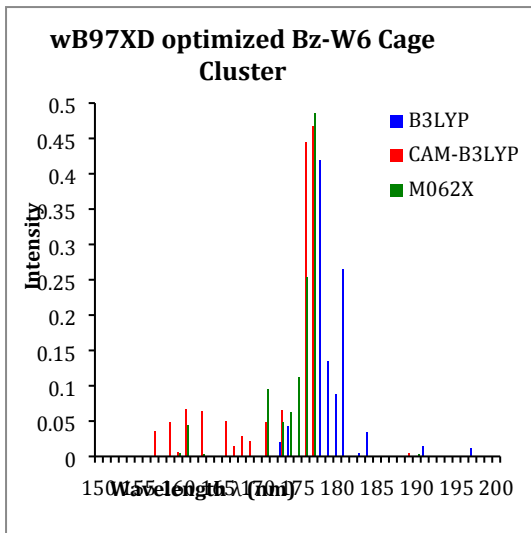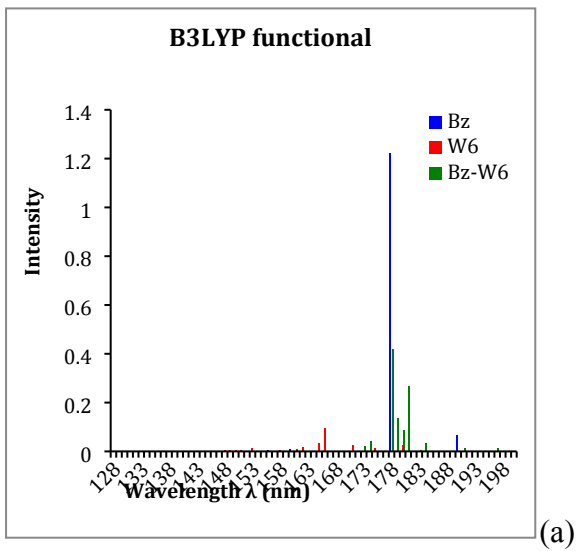

(b)

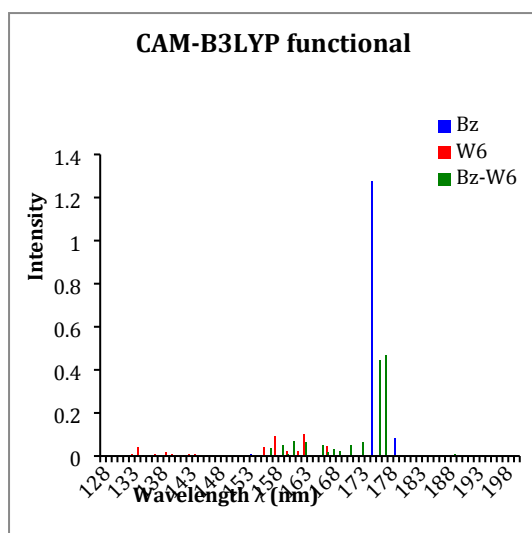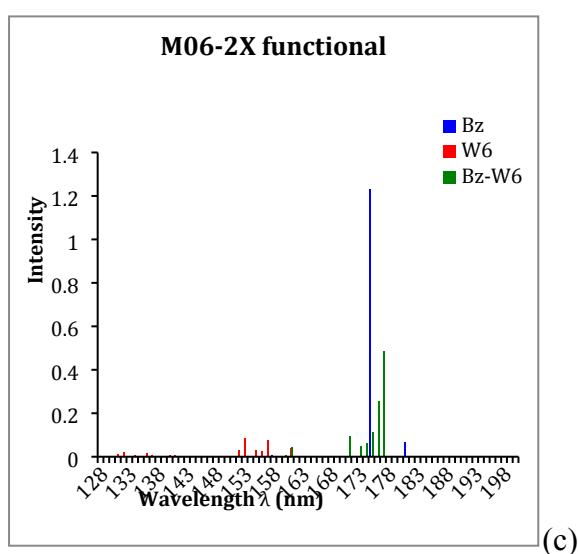

(d)

Figure S2. Simulated UV spectra obtained from TDDFT calculations on wB97XD optimized ground state geometries of cage shaped water  $W_6$  cluster, Bz- $W_6$  cluster and Bz using 6-31++G(d,p) basis set (a) Comparison of B3LYP, CAM-B3LYP and M062X functionals performance on Bz- $W_6$  prism cluster (b) Performance of B3LYP functional (c) Performance of CAM-B3LYP functional (d) Performance of M06-2X functional.

Table S2. List of important electronic transitions corresponding to highest peak intensities (oscillator strengths) obtained using B3LYP, CAM-B3LYP and M062X hybrid functionals on wB97XD optimized Bz- $W_6$  cage clusters using 6-31++G(d,p) basis set. (Value in parenthesis correspond to singlet  $\pi \rightarrow \pi^*$  transition of an isolated benzene molecule).

| DFT functional   | E (eV)      | $\lambda$ (nm) | Oscillator strength ( $f$ ) | Electronic transition   |
|------------------|-------------|----------------|-----------------------------|-------------------------|
| <b>M06-2X</b>    | 7.00 (7.10) | 177.0 (174.6)  | 0.3278 (0.6154)             | $\pi \rightarrow \pi^*$ |
|                  | 7.01        | 176.8          | 0.1586                      | $\pi \rightarrow \pi^*$ |
|                  | 7.03        | 176.3          | 0.2542                      | $\pi \rightarrow \pi^*$ |
|                  | 7.09        | 174.7          | 0.1126                      | Bz CT state             |
|                  | 7.12        | 174.6          | 0.0631                      | $\pi \rightarrow \pi^*$ |
|                  | 7.23        | 171.5          | 0.0433                      | Bz CT state             |
|                  | 7.27        | 170.5          | 0.0526                      | Bz CT state             |
| <b>CAM-B3LYP</b> | 7.02 (7.08) | 176.7 (175.0)  | 0.4669 (0.637)              | $\pi \rightarrow \pi^*$ |
|                  | 7.05        | 175.9          | 0.4455                      | $\pi \rightarrow \pi^*$ |
|                  | 7.71        | 160.9          | 0.0673                      | W-Rydberg state         |
|                  | 7.62        | 162.8          | 0.0635                      | W-Rydberg state         |
| <b>B3LYP</b>     | 6.96 (6.97) | 178.0 (177.9)  | 0.3113 (0.6122)             | $\pi \rightarrow \pi^*$ |
|                  | 6.95        | 178.3          | 0.1080                      | W-Rydberg State         |
|                  | 6.87        | 180.6          | 0.1823                      | W-Rydberg state         |
|                  | 6.92        | 179.1          | 0.1352                      | Bz-Diffuse state        |
|                  | 6.89        | 180.0          | 0.0881                      | Bz CT state             |
|                  | 6.84        | 181.3          | 0.0833                      | W-Rydberg state         |

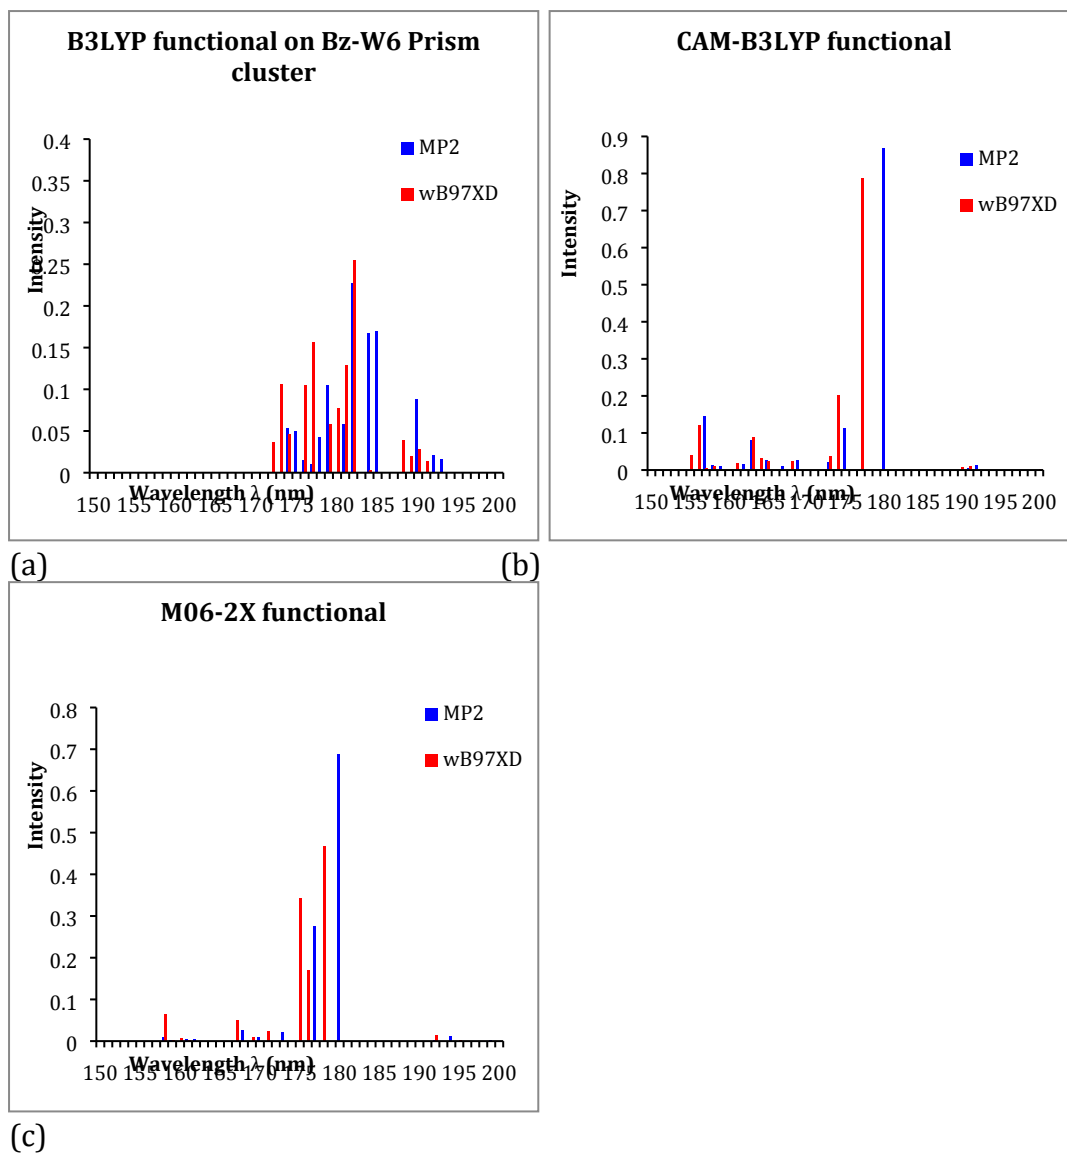

Figure S3. Comparison of UV spectra obtained from TDDFT calculations on MP2 and wB97XD optimized ground state geometries of prism shaped Bz-W<sub>6</sub> cluster: (a) Performance of B3LYP functional (b) Performance of CAM-B3LYP functional (c) Performance of M06-2X functional.

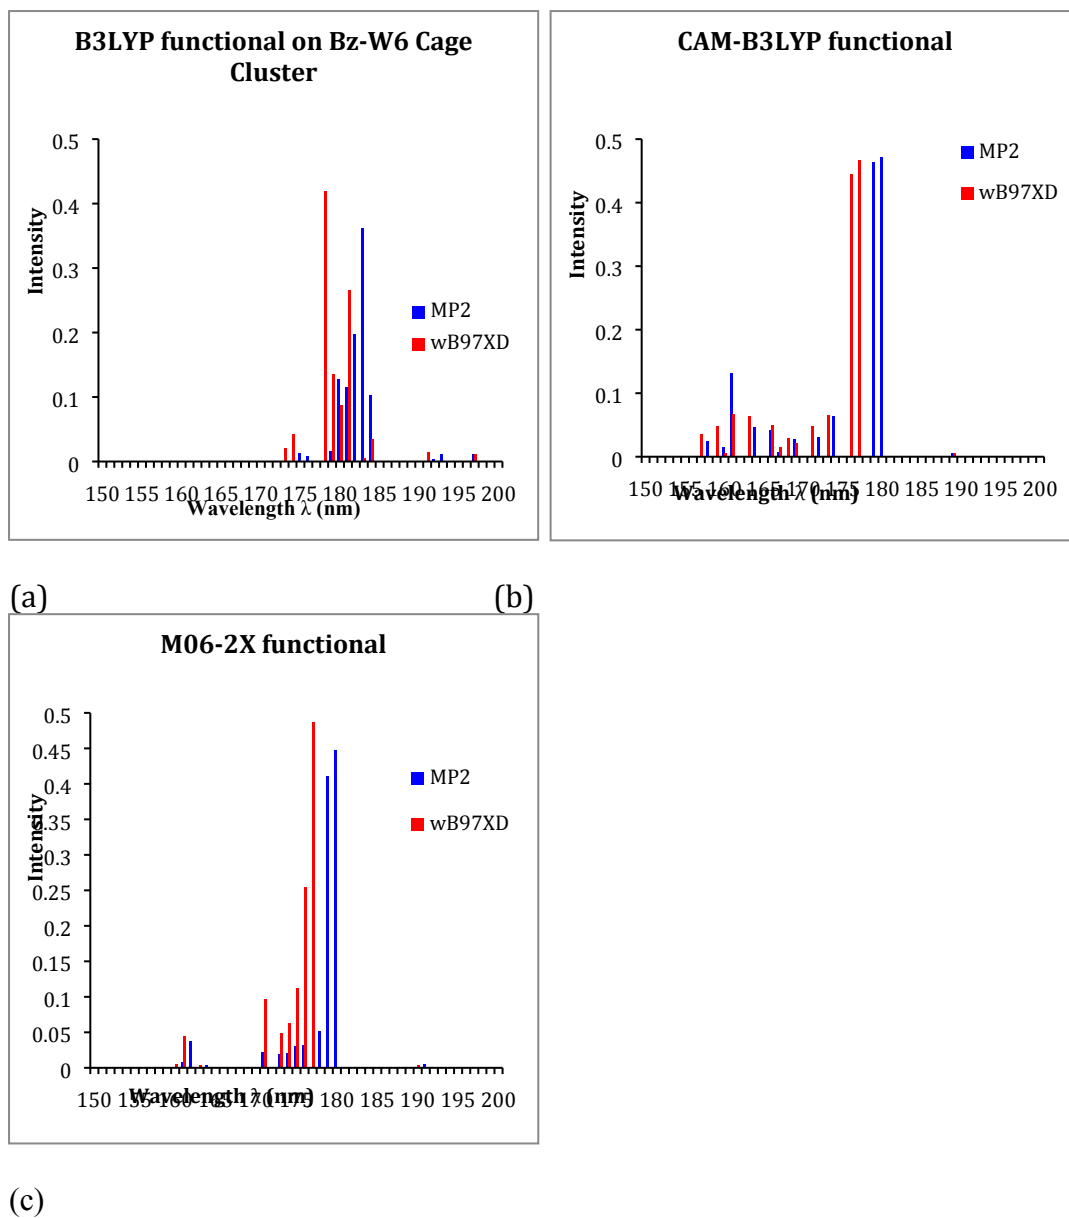

Figure S4. Comparison of UV spectra obtained from TDDFT calculations on MP2 and wB97XD optimized ground state geometries of cage shaped Bz-W<sub>6</sub> cluster: (a) Performance of B3LYP functional (b) Performance of CAM-B3LYP functional (c) Performance of M06-2X functional.

Table S3. List of important electronic transitions corresponding to highest peak intensities (or oscillator strengths) obtained using B3LYP, CAM-B3LYP and M06-2X hybrid functionals with aug-cc-pVTZ basis set on MP2 optimized Bz-W<sub>6</sub> prism shaped clusters. (Value in parenthesis correspond to singlet  $\pi \rightarrow \pi^*$  transition of an isolated benzene molecule).

| DFT functional   | E (eV)      | $\lambda$ (nm) | Oscillator strength ( <i>f</i> ) | Electronic transition   |
|------------------|-------------|----------------|----------------------------------|-------------------------|
| <b>M06-2X</b>    | 6.81 (6.91) | 181.9 (179.4)  | 0.4083 (0.6084)                  | $\pi \rightarrow \pi^*$ |
|                  | 6.81        | 182.1          | 0.3876                           | $\pi \rightarrow \pi^*$ |
|                  | 6.96        | 178.1          | 0.1047                           | $\pi \rightarrow \pi^*$ |
| <b>CAM-B3LYP</b> | 6.81 (6.91) | 181.9 (179.6)  | 0.4362 (0.6301)                  | $\pi \rightarrow \pi^*$ |
|                  | 6.83        | 181.6          | 0.4359                           | $\pi \rightarrow \pi^*$ |
|                  | 7.61        | 162.9          | 0.0731                           | W-Rydberg state         |
|                  | 7.05        | 175.8          | 0.0811                           | $\pi \rightarrow \pi^*$ |
| <b>B3LYP</b>     | 6.66 (6.80) | 186.1 (182.4)  | 0.2346 (0.6064)                  | $\pi \rightarrow \pi^*$ |
|                  | 6.70        | 185.1          | 0.2194                           | $\pi \rightarrow \pi^*$ |
|                  | 6.84        | 181.4          | 0.0687                           | Bz CT state             |
|                  | 6.77        | 183.2          | 0.0576                           | W CT state              |

Table S4. List of important electronic transitions corresponding to highest peak intensities (or oscillator strengths) obtained using B3LYP, CAM-B3LYP and M06-2X hybrid functionals with aug-cc-pVTZ on MP2 optimized Bz-W<sub>6</sub> cage shaped clusters. (Value in parenthesis correspond to singlet  $\pi \rightarrow \pi^*$  transition of an isolated benzene molecule).

| DFT functional   | E (eV)      | $\lambda$ (nm) | Oscillator strength ( <i>f</i> ) | Electronic transition   |
|------------------|-------------|----------------|----------------------------------|-------------------------|
| <b>M06-2X</b>    | 6.83 (6.92) | 181.6 (179.4)  | 0.4480 (0.5826)                  | $\pi \rightarrow \pi^*$ |
|                  | 6.85        | 180.9          | 0.4173                           | $\pi \rightarrow \pi^*$ |
|                  | 6.98        | 177.7          | 0.0423                           | Bz CT State             |
| <b>CAM-B3LYP</b> | 6.83 (6.91) | 181.5 (179.6)  | 0.4675 (0.6068)                  | $\pi \rightarrow \pi^*$ |
|                  | 6.86        | 180.6          | 0.4488                           | $\pi \rightarrow \pi^*$ |
|                  | 7.10        | 174.6          | 0.0582                           | $\pi \rightarrow \pi^*$ |



|              |             |               |                 | Diffused $\pi \rightarrow \pi^*$ |
|--------------|-------------|---------------|-----------------|----------------------------------|
| <b>B3LYP</b> | 6.74 (6.80) | 183.8 (182.4) | 0.2215 (0.5824) | $\pi \rightarrow \pi^*$          |
|              | 6.70        | 184.9         | 0.2009          | $\pi \rightarrow \pi^*$          |
|              | 6.72        | 184.6         | 0.1730          | $\pi \rightarrow \pi^*$          |
|              | 6.67        | 185.8         | 0.157           | Bz Diffuse state                 |
|              | 6.89        | 180.0         | 0.0932          | W CT state                       |
